# Supplementary material for: Oral-Health-Related Quality of Life in Patients with Medication-Related Osteonecrosis of the Jaw: A Prospective Clinical Study
Source: MDPI journal article supplement (doi:10.3390/ijerph191811709), 2022-09-16
Supplement: s1 [file s1]

**Table S3.** Descriptive data of the OHIP domains psychological disability and social disability from the seven-domain OHIP structure. SD: Standard deviation.

| OHIP Domain             |              | Psychological Disability |     |      |     |      |     | Social Disability |     |      |     |      |     |
|-------------------------|--------------|--------------------------|-----|------|-----|------|-----|-------------------|-----|------|-----|------|-----|
| Time of Assessment      |              | T0                       |     | T1   |     | T2   |     | T0                |     | T1   |     | T2   |     |
| Parameter               | Groups       | Mean                     | SD  | Mean | SD  | Mean | SD  | Mean              | SD  | Mean | SD  | Mean | SD  |
| Total                   | -            | 7.6                      | 5.6 | 5.4  | 3.9 | 5.6  | 4.5 | 5.0               | 5.0 | 3.7  | 3.8 | 4.3  | 4.3 |
| Stage                   | I            | 8.2                      | 5.5 | 6.1  | 3.9 | 6.2  | 4.9 | 5.4               | 5.4 | 3.8  | 4.1 | 4.4  | 4.5 |
|                         | II           | 6.5                      | 5.8 | 3.8  | 3.7 | 4.3  | 3.3 | 3.9               | 4.1 | 3.5  | 3.4 | 3.8  | 3.7 |
| Pain                    | no           | 6.1                      | 4.2 | 4.9  | 3.2 | 4.4  | 3.2 | 4.3               | 3.8 | 2.8  | 3.1 | 3.4  | 3.3 |
|                         | yes          | 8.7                      | 6.3 | 5.8  | 4.4 | 6.4  | 5.2 | 5.5               | 5.8 | 4.3  | 4.2 | 4.9  | 4.8 |
| Primary disease         | osteoporosis | 11.5                     | 4.9 | 6.9  | 3.3 | 6.1  | 4.5 | 7.6               | 5.2 | 4.9  | 4.7 | 4.1  | 4.9 |
|                         | malignoma    | 6.5                      | 5.4 | 5.0  | 4.1 | 5.4  | 4.6 | 4.2               | 4.8 | 3.4  | 3.6 | 4.3  | 4.1 |
| Risk evaluation         | low risk     | 10.4                     | 5.0 | 5.7  | 3.3 | 5.7  | 4.1 | 6.1               | 4.9 | 3.8  | 4.3 | 3.5  | 4.3 |
|                         | high risk    | 6.3                      | 5.5 | 5.3  | 4.3 | 5.5  | 4.8 | 4.4               | 5.1 | 3.7  | 3.7 | 4.6  | 4.3 |
| Duration of intake      | short        | 5.3                      | 4.0 | 4.4  | 3.3 | 5.0  | 2.3 | 3.6               | 4.1 | 3.1  | 3.3 | 4.0  | 3.1 |
|                         | long         | 9.3                      | 6.1 | 6.1  | 4.3 | 6.0  | 5.6 | 6.0               | 5.5 | 4.1  | 4.2 | 4.4  | 4.9 |
| Defect size             | small        | 8.6                      | 5.8 | 6.6  | 3.2 | 6.7  | 3.6 | 6.3               | 6.1 | 4.6  | 4.1 | 4.6  | 4.3 |
|                         | medium       | 7.6                      | 5.5 | 6.0  | 4.5 | 5.3  | 6.6 | 5.1               | 5.4 | 4.2  | 4.1 | 4.6  | 5.6 |
|                         | large        | 6.9                      | 5.8 | 3.9  | 3.8 | 4.9  | 3.5 | 3.9               | 3.9 | 2.6  | 3.5 | 3.8  | 3.2 |
| Need for prosthodontics | yes          | 8.9                      | 5.8 | 6.2  | 4.1 | 6.6  | 5.2 | 5.5               | 4.7 | 4.1  | 4.0 | 4.7  | 4.5 |
|                         | no           | 6.5                      | 5.4 | 4.7  | 3.7 | 4.7  | 3.7 | 4.5               | 5.4 | 3.4  | 3.8 | 3.9  | 3.8 |
