# Supplementary material for: Oral-Health-Related Quality of Life in Patients with Medication-Related Osteonecrosis of the Jaw: A Prospective Clinical Study
Source: MDPI journal article supplement (doi:10.3390/ijerph191811709), 2022-09-16
Supplement: s1 [file s1]

**Table S2.** Descriptive data of the OHIP domains physical pain and physical disability from the seven-domain OHIP structure. SD: Standard deviation.

| OHIP Domain             |              | Physical Pain |     |      |     |      |     | Physical Disability |     |      |     |      |     |
|-------------------------|--------------|---------------|-----|------|-----|------|-----|---------------------|-----|------|-----|------|-----|
| Time of Assessment      |              | T0            |     | T1   |     | T2   |     | T0                  |     | T1   |     | T2   |     |
| Parameter               | Groups       | Mean          | SD  | Mean | SD  | Mean | SD  | Mean                | SD  | Mean | SD  | Mean | SD  |
| Total                   | -            | 16.1          | 8.1 | 10.9 | 6.2 | 9.3  | 6.0 | 11.4                | 8.1 | 10.3 | 7.0 | 9.1  | 5.9 |
| Stage                   | I            | 15.4          | 7.5 | 10.7 | 6.1 | 9.7  | 6.4 | 12.1                | 7.8 | 10.8 | 6.7 | 10.0 | 6.1 |
|                         | II           | 17.7          | 9.4 | 11.5 | 6.6 | 8.4  | 5.3 | 10.0                | 9.1 | 9.1  | 7.9 | 6.9  | 5.0 |
| Pain                    | no           | 14.9          | 8.3 | 9.5  | 4.2 | 8.3  | 5.8 | 10.3                | 6.3 | 10.0 | 7.2 | 8.9  | 5.1 |
|                         | yes          | 17.0          | 8.0 | 11.9 | 7.2 | 10.0 | 6.2 | 12.2                | 9.3 | 10.5 | 7.1 | 9.1  | 6.5 |
| Primary disease         | osteoporosis | 17.8          | 4.3 | 10.0 | 4.7 | 8.3  | 4.5 | 14.9                | 6.7 | 11.0 | 4.0 | 10.0 | 7.1 |
|                         | malignoma    | 15.6          | 8.9 | 11.2 | 6.6 | 9.6  | 6.4 | 10.5                | 8.4 | 10.1 | 7.7 | 8.8  | 5.6 |
| Risk evaluation         | low risk     | 20.5          | 6.3 | 10.7 | 4.4 | 9.0  | 6.8 | 14.2                | 6.8 | 9.3  | 4.3 | 8.8  | 6.7 |
|                         | high risk    | 13.9          | 8.1 | 11.0 | 7.0 | 9.4  | 5.8 | 10.1                | 8.5 | 10.8 | 8.1 | 9.2  | 5.6 |
| Duration of intake      | short        | 15.7          | 8.8 | 10.7 | 6.0 | 10.0 | 5.7 | 8.5                 | 6.8 | 10.3 | 7.9 | 9.8  | 3.8 |
|                         | long         | 16.3          | 7.8 | 11.1 | 6.4 | 8.8  | 6.3 | 13.5                | 8.5 | 10.2 | 6.5 | 8.5  | 7.1 |
| Defect size             | small        | 15.7          | 6.9 | 12.5 | 5.3 | 11.1 | 7.4 | 11.1                | 7.6 | 11.5 | 5.4 | 10.4 | 3.7 |
|                         | medium       | 16.1          | 7.9 | 11.1 | 7.6 | 7.9  | 6.2 | 12.9                | 9.6 | 11.6 | 9.3 | 8.6  | 6.7 |
|                         | large        | 16.4          | 9.5 | 9.6  | 5.8 | 8.9  | 4.7 | 10.6                | 7.7 | 8.3  | 6.0 | 8.4  | 6.8 |
| Need for prosthodontics | yes          | 19.8          | 8.3 | 12.4 | 7.1 | 10.2 | 7.2 | 14.3                | 8.4 | 12.6 | 7.8 | 10.2 | 7.1 |
|                         | no           | 12.8          | 6.5 | 9.6  | 5.2 | 8.5  | 4.8 | 8.9                 | 7.2 | 8.2  | 5.7 | 8.1  | 4.5 |
