# Supplementary material for: Oral-Health-Related Quality of Life in Patients with Medication-Related Osteonecrosis of the Jaw: A Prospective Clinical Study
Source: MDPI journal article supplement (doi:10.3390/ijerph191811709), 2022-09-16
Supplement: s1 [file s1]

**Table S4.** Descriptive data of the OHIP domain handicap from the seven-domain OHIP structure. SD: Standard deviation.

| OHIP Domain             |              | Handicap |     |      |     |      |     |
|-------------------------|--------------|----------|-----|------|-----|------|-----|
| Time of Assessment      |              | T0       |     | T1   |     | T2   |     |
| Parameter               | Groups       | Mean     | SD  | Mean | SD  | Mean | SD  |
| Total                   | -            | 7.1      | 5.3 | 6.0  | 5.0 | 5.8  | 4.8 |
| Stage                   | I            | 7.7      | 5.4 | 6.4  | 5.1 | 6.2  | 5.0 |
|                         | II           | 5.7      | 4.8 | 5.2  | 4.7 | 4.7  | 4.2 |
| Pain                    | no           | 6.2      | 4.2 | 5.9  | 4.9 | 5.1  | 4.6 |
|                         | yes          | 7.8      | 5.9 | 6.1  | 5.1 | 6.2  | 5.0 |
| Primary disease         | osteoporosis | 9.5      | 5.2 | 7.5  | 4.5 | 5.9  | 5.4 |
|                         | malignoma    | 6.4      | 5.2 | 5.6  | 5.1 | 5.7  | 4.7 |
| Risk evaluation         | low risk     | 8.3      | 4.9 | 5.8  | 4.6 | 6.0  | 5.4 |
|                         | high risk    | 6.5      | 5.5 | 6.1  | 5.2 | 5.6  | 4.6 |
| Duration of intake      | short        | 4.8      | 3.9 | 5.3  | 4.9 | 6.1  | 3.6 |
|                         | long         | 8.8      | 5.6 | 6.5  | 5.1 | 5.5  | 5.5 |
| Defect size             | small        | 7.7      | 5.8 | 7.4  | 4.4 | 8.2  | 4.9 |
|                         | medium       | 6.8      | 5.7 | 6.6  | 5.7 | 5.2  | 5.4 |
|                         | large        | 6.9      | 4.9 | 4.4  | 4.7 | 4.3  | 3.7 |
| Need for prosthodontics | yes          | 8.1      | 5.1 | 7.3  | 5.3 | 6.6  | 5.1 |
|                         | no           | 6.2      | 5.4 | 4.8  | 4.5 | 5.0  | 4.5 |
