# Supplementary material for: Oral-Health-Related Quality of Life in Patients with Medication-Related Osteonecrosis of the Jaw: A Prospective Clinical Study
Source: MDPI journal article supplement (doi:10.3390/ijerph191811709), 2022-09-16
Supplement: s1 [file s1]

**Table S6.** Descriptive data from the OHIP dimensions orofacial appearance and psychosocial impact from the four dimensional OHIP scale. SD: Standard deviation.

| OHIP Dimension          |              | Orofacial Appearance |      |      |     |      |     | Psychosocial Impact |      |      |      |      |      |
|-------------------------|--------------|----------------------|------|------|-----|------|-----|---------------------|------|------|------|------|------|
| Time of Assessment      |              | T0                   |      | T1   |     | T2   |     | T0                  |      | T1   |      | T2   |      |
| Parameter               | Groups       | Mean                 | SD   | Mean | SD  | Mean | SD  | Mean                | SD   | Mean | SD   | Mean | SD   |
| Total                   | -            | 10.0                 | 5.7  | 7.3  | 4.9 | 6.2  | 5.3 | 22.8                | 12.3 | 17.1 | 13.3 | 15.6 | 13.2 |
| Stage                   | I            | 9.6                  | 5.5  | 6.2  | 3.9 | 4.9  | 4.0 | 21.9                | 16.0 | 15.8 | 12.4 | 13.1 | 10.8 |
|                         | II           | 11.0                 | 6.1  | 9.8  | 6.2 | 9.1  | 6.9 | 24.8                | 17.5 | 20.0 | 15.4 | 21.5 | 16.5 |
| Pain                    | no           | 10.1                 | 4.8  | 6.5  | 4.1 | 7.0  | 4.9 | 20.0                | 14.2 | 15.1 | 10.5 | 16.1 | 11.2 |
|                         | yes          | 10.0                 | 6.3  | 7.9  | 5.5 | 5.6  | 5.7 | 24.9                | 17.7 | 18.5 | 15.1 | 15.3 | 14.7 |
| Primary disease         | osteoporosis | 10.7                 | 6.7  | 6.8  | 5.5 | 5.6  | 5.0 | 22.8                | 17.0 | 14.5 | 11.3 | 15.1 | 9.2  |
|                         | malignoma    | 9.9                  | 5.4  | 7.5  | 4.8 | 6.3  | 5.5 | 22.8                | 16.4 | 17.9 | 13.9 | 15.8 | 14.3 |
| Risk evaluation         | low risk     | 11.6                 | 7.6  | 7.1  | 6.5 | 6.7  | 6.6 | 27.5                | 21.1 | 17.5 | 16.5 | 19.9 | 17.2 |
|                         | high risk    | 9.3                  | 4.4  | 7.4  | 4.1 | 5.9  | 4.7 | 20.5                | 13.2 | 16.9 | 11.8 | 13.5 | 10.4 |
| Duration of intake      | short        | 10.3                 | 5.2  | 7.7  | 4.4 | 6.2  | 5.2 | 25.6                | 15.7 | 19.7 | 14.0 | 14.9 | 12.2 |
|                         | long         | 20.9                 | 16.8 | 7.0  | 5.4 | 6.1  | 5.6 | 20.8                | 16.8 | 15.2 | 12.8 | 16.2 | 14.1 |
| Defect size             | small        | 10.5                 | 5.9  | 6.7  | 4.2 | 5.5  | 3.8 | 23.7                | 15.6 | 16.8 | 11.8 | 15.3 | 11.2 |
|                         | medium       | 9.4                  | 5.4  | 7.5  | 5.0 | 6.0  | 6.2 | 19.3                | 14.8 | 14.2 | 12.9 | 13.5 | 12.0 |
|                         | large        | 10.1                 | 5.9  | 7.6  | 5.7 | 6.9  | 5.9 | 24.9                | 18.5 | 19.6 | 15.1 | 17.6 | 15.9 |
| Need for prosthodontics | yes          | 11.2                 | 5.7  | 8.2  | 5.6 | 6.9  | 6.8 | 26.5                | 16.2 | 18.6 | 13.9 | 18.1 | 16.1 |
|                         | no           | 8.9                  | 5.5  | 6.5  | 4.2 | 5.4  | 3.7 | 19.5                | 16.0 | 15.8 | 13.0 | 13.4 | 9.8  |
