# Supplementary material for: Oral-Health-Related Quality of Life in Patients with Medication-Related Osteonecrosis of the Jaw: A Prospective Clinical Study
Source: MDPI journal article supplement (doi:10.3390/ijerph191811709), 2022-09-16
Supplement: s1 [file s1]

**Table S1.** Descriptive data of the OHIP domains functional limitation and psychological discomfort from the seven-domain OHIP structure. SD: Standard deviation.

| OHIP Domain             |              | Functional Limitation |     |      |     |      |     | Psychological Discomfort |     |      |     |      |     |
|-------------------------|--------------|-----------------------|-----|------|-----|------|-----|--------------------------|-----|------|-----|------|-----|
| Time of Assessment      |              | T0                    |     | T1   |     | T2   |     | T0                       |     | T1   |     | T2   |     |
| Parameter               | Groups       | Mean                  | SD  | Mean | SD  | Mean | SD  | Mean                     | SD  | Mean | SD  | Mean | SD  |
| Total                   | -            | 13.0                  | 6.9 | 11.0 | 5.6 | 9.8  | 6.3 | 9.9                      | 5.4 | 6.4  | 4.1 | 5.6  | 4.0 |
| Stage                   | I            | 13.8                  | 6.9 | 11.2 | 5.8 | 10.5 | 6.7 | 10.3                     | 5.1 | 6.4  | 3.9 | 6.1  | 4.2 |
|                         | II           | 11.3                  | 6.9 | 10.5 | 5.6 | 8.3  | 5.0 | 8.9                      | 6.1 | 6.5  | 4.6 | 4.6  | 3.3 |
| Pain                    | no           | 12.4                  | 5.0 | 10.3 | 5.9 | 9.1  | 6.0 | 8.6                      | 4.3 | 6.4  | 4.1 | 5.5  | 3.3 |
|                         | yes          | 13.4                  | 8.1 | 11.5 | 5.5 | 10.3 | 6.6 | 10.8                     | 5.9 | 6.4  | 4.1 | 5.7  | 4.5 |
| Primary disease         | osteoporosis | 15.9                  | 5.5 | 10.5 | 3.8 | 9.4  | 5.0 | 12.3                     | 5.1 | 6.0  | 3.5 | 5.3  | 3.7 |
|                         | malignoma    | 12.2                  | 7.2 | 11.1 | 6.1 | 10.0 | 6.7 | 9.2                      | 5.3 | 6.5  | 4.2 | 5.7  | 4.1 |
| Risk evaluation         | low risk     | 14.9                  | 4.8 | 9.8  | 3.8 | 8.3  | 4.9 | 12.1                     | 4.3 | 5.8  | 3.4 | 5.5  | 3.8 |
|                         | high risk    | 12.0                  | 7.7 | 11.6 | 6.4 | 10.5 | 6.8 | 8.8                      | 5.6 | 6.7  | 4.4 | 5.7  | 4.1 |
| Duration of intake      | short        | 11.6                  | 5.3 | 11.5 | 5.4 | 10.3 | 4.2 | 8.5                      | 4.5 | 6.9  | 4.3 | 6.5  | 2.9 |
|                         | long         | 14.1                  | 7.8 | 10.5 | 5.9 | 9.4  | 7.5 | 10.8                     | 5.8 | 6.1  | 3.9 | 5.0  | 4.6 |
| Defect size             | small        | 12.3                  | 6.0 | 11.2 | 2.2 | 10.1 | 3.9 | 10.6                     | 4.1 | 8.0  | 3.3 | 6.8  | 3.3 |
|                         | medium       | 12.8                  | 8.0 | 12.4 | 8.1 | 10.5 | 9.2 | 9.6                      | 5.3 | 6.1  | 4.5 | 4.9  | 5.0 |
|                         | large        | 13.7                  | 7.2 | 9.7  | 5.3 | 9.0  | 5.3 | 9.5                      | 6.5 | 5.4  | 4.2 | 5.2  | 3.6 |
| Need for prosthodontics | yes          | 15.9                  | 7.3 | 12.7 | 6.3 | 11.4 | 7.1 | 11.8                     | 4.9 | 7.5  | 4.2 | 6.7  | 4.3 |
|                         | no           | 10.4                  | 5.6 | 9.5  | 4.6 | 8.4  | 5.2 | 8.2                      | 5.3 | 5.4  | 3.8 | 4.6  | 3.4 |
