# Supplementary material for: Oral-Health-Related Quality of Life in Patients with Medication-Related Osteonecrosis of the Jaw: A Prospective Clinical Study
Source: MDPI journal article supplement (doi:10.3390/ijerph191811709), 2022-09-16
Supplement: s1 [file s1]

**Table S5.** Descriptive data from the OHIP dimensions oral function and orofacial pain from the four dimensional OHIP scale. SD: Standard deviation.

| OHIP Dimension          |              | Oral Function |      |      |     |      |      | Orofacial Pain |     |      |     |      |     |
|-------------------------|--------------|---------------|------|------|-----|------|------|----------------|-----|------|-----|------|-----|
| Time of Assessment      |              | T0            |      | T1   |     | T2   |      | T0             |     | T1   |     | T2   |     |
| Parameter               | Groups       | Mean          | SD   | Mean | SD  | Mean | SD   | Mean           | SD  | Mean | SD  | Mean | SD  |
| Total                   | -            | 13.3          | 8.9  | 12.5 | 8.4 | 10.2 | 7.8  | 13.1           | 6.7 | 8.2  | 4.9 | 6.9  | 5.3 |
| Stage                   | I            | 12.5          | 8.8  | 11.1 | 7.6 | 8.6  | 7.1  | 13.1           | 5.8 | 8.1  | 4.0 | 5.8  | 4.9 |
|                         | II           | 14.9          | 9.4  | 15.7 | 9.3 | 14.0 | 8.1  | 13.4           | 8.8 | 8.3  | 6.7 | 9.6  | 5.4 |
| Pain                    | no           | 12.9          | 7.7  | 10.4 | 6.6 | 10.2 | 7.3  | 14.1           | 6.1 | 7.9  | 4.6 | 8.3  | 6.1 |
|                         | yes          | 13.5          | 9.9  | 14.0 | 9.4 | 10.2 | 8.3  | 12.6           | 7.2 | 8.4  | 5.2 | 5.9  | 4.5 |
| Primary disease         | osteoporosis | 14.6          | 11.2 | 12.3 | 9.3 | 9.6  | 9.1  | 11.1           | 6.3 | 5.8  | 4.2 | 5.1  | 4.6 |
|                         | malignoma    | 12.9          | 8.4  | 12.6 | 8.3 | 10.4 | 7.5  | 13.8           | 6.8 | 8.6  | 4.9 | 7.5  | 5.4 |
| Risk evaluation         | low risk     | 16.6          | 11.8 | 14.7 | 9.8 | 12.5 | 10.0 | 12.5           | 6.6 | 7.5  | 6.5 | 6.8  | 5.2 |
|                         | high risk    | 11.6          | 6.7  | 11.9 | 7.8 | 9.1  | 6.3  | 13.5           | 6.9 | 8.5  | 4.0 | 7.0  | 5.4 |
| Duration of intake      | short        | 15.0          | 6.1  | 13.9 | 8.1 | 10.7 | 6.9  | 12.1           | 6.5 | 7.9  | 4.9 | 6.9  | 4.6 |
|                         | long         | 12.0          | 10.4 | 11.6 | 8.7 | 9.9  | 8.5  | 14.0           | 6.7 | 11.6 | 8.7 | 9.9  | 8.5 |
| Defect size             | small        | 14.0          | 10.0 | 12.5 | 8.6 | 10.9 | 7.4  | 11.8           | 4.6 | 8.5  | 3.8 | 6.6  | 3.1 |
|                         | medium       | 12.7          | 8.4  | 9.6  | 9.7 | 7.7  | 7.5  | 12.4           | 7.0 | 7.7  | 4.5 | 7.5  | 5.8 |
|                         | large        | 13.1          | 9.1  | 14.8 | 7.0 | 11.6 | 8.3  | 14.9           | 7.9 | 8.3  | 6.1 | 6.7  | 6.5 |
| Need for prosthodontics | yes          | 15.6          | 9.9  | 14.4 | 9.0 | 12.8 | 8.4  | 13.4           | 6.7 | 7.8  | 5.6 | 6.8  | 6.2 |
|                         | no           | 11.2          | 7.6  | 10.8 | 7.7 | 7.9  | 6.5  | 13.1           | 6.9 | 8.5  | 4.2 | 7.1  | 4.5 |
